# Supplementary material for: Suppression of orbital-induced polar amplification by lower GHG concentrations improves Mid-Holocene simulations in PMIP4
Source: Copernicus journal article supplement (doi:10.5194/egusphere-2026-664), 2026-02-05
Supplement: Supplementary file [file egusphere-2026-664-AC2-supplement.pdf]

**AC2:**

We thank the reviewer for the positive assessment and for recognizing the timeliness and value of this study in elucidating the intergenerational differences between PMIP3 and PMIP4 mid-Holocene simulations, as well as their implications for the “Holocene temperature conundrum”.

We are particularly grateful for the reviewer’s concise articulation of our key findings, specifically the central role of GHG forcing and associated feedbacks in driving the simulated contrasts and the diminished polar amplification seen in PMIP4. We also appreciate the reviewer’s acknowledgment that the CFRAM-based process analysis provides a useful framework for clarifying these model-generation discrepancies.

Thank you again for this supportive and encouraging review.
